# Supplementary material for: In Vitro Anti-HIV-1 Reverse Transcriptase and Integrase Properties of Punica granatum L. Leaves, Bark, and Peel Extracts and Their Main Compounds
Source: MDPI journal article supplement (doi:10.3390/plants10102124), 2021-10-07

**Table S1.** Selected method for quantification and specifications, linearity range,  $R^2$  and calibration curve of the main compounds quantified in pomegranate extracts through HPLC-PDA-MS/MS.

| Compound                 | Method                      | Linearity range ( $\mu\text{g/mL}$ ) | $R^2$ | Calibration curve           |
|--------------------------|-----------------------------|--------------------------------------|-------|-----------------------------|
| Ellagic acid             | UV<br>370 nm                | 0.1-100                              | 0.999 | $y = 44443.1x - 8,761.63$   |
| Luteolin                 | SRM <sup>+</sup><br>287→153 | 0.1-5                                | 0.999 | $y = 1181554.7x + 61020.8$  |
| Apigenin                 | SRM <sup>+</sup><br>271→153 | 0.1-5                                | 0.999 | $y = 1072063.8x + 545489.2$ |
| Punicalin $\alpha+\beta$ | UV<br>370 nm                | 5-100                                | 0.999 | $y = 5759.8x - 9501.1$      |
| Punicalagin $\alpha$     | UV<br>370 nm                | 10-500                               | 0.999 | $y = 1834.8x - 11147$       |
| Punicalagin $\beta$      | UV<br>370 nm                | 10-500                               | 0.998 | $y = 2425.9x - 1031$        |

**Figure S1.** Representative LC-PDA profiles of PGL (A), PGB (B) and PGP (C) extracts ( $\lambda=370\text{nm}$ )

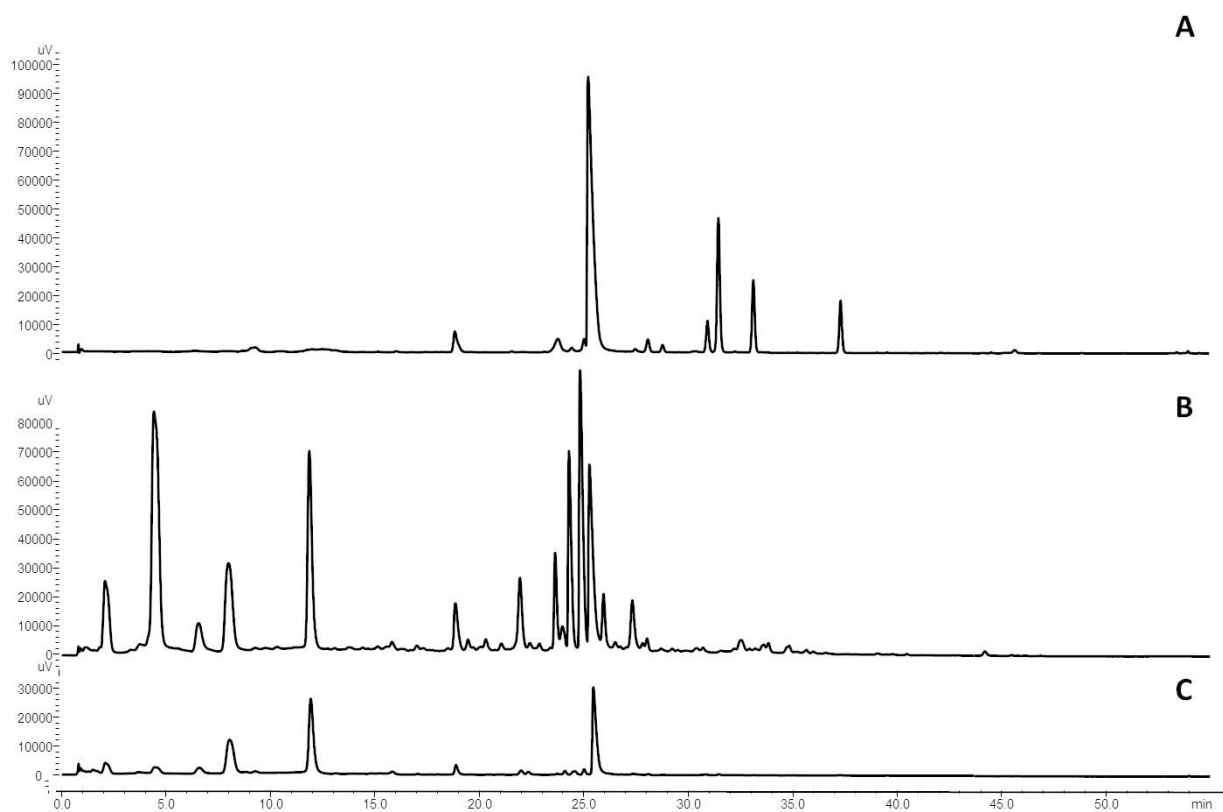

Supplement: s1 [file s1]
